# Supplementary material for: Long non-coding RNA HOTAIR as a competitive endogenous RNA to sponge miR-206 to promote colorectal cancer progression by activating CCL2
Source: PubMed Central journal article supplement (PMC7255378; doi:10.7150/jca.42308), 2020-05-18
Supplement: jcav11p4431s1.pdf [file jcav11p4431s1.pdf]

**Table S1. Complete list of primers used in this work. Sequences are from the GenBank.**

| Name      | sequencing                                                                      |
|-----------|---------------------------------------------------------------------------------|
| CCL2      | Forward: GAGGGCGACACTGCTTTTTTC<br>Reverse: CCAGCTCCAGGAAATGCTAG                 |
| HOTAIR    | Forward: GGTAGAAAAAGCAACCACGAAGC<br>Reverse: ACATAAACCT CTGTCTGTG AGTGCC        |
| GAPDH     | Forward: CACCCACTCCTCCACCTTTG<br>Reverse: CCACCACCCTGTTGCTGTAG                  |
| miR-206   | Forward: 5' -CCACACTTCCTTACATTCCA-3'<br>Reverse: 5' - GCGAGCACAGAATTAATACGAC-3' |
| U6        | Forward: 5' - CTCGCTTCGGCAGCACA-3'<br>Reverse: 5' - AACGCTTCACGAATTTGCGT-3'     |
| Si-HOTAIR | #1: 5' -GAACGGGAGUACAGAGAGAUU-3'<br>#2: 5' -CCACAUGAACGCCCAGAGAUU-3'            |
| Si-NC     | 5' -CUACAACAGCCACAACGUCdTd-3'                                                   |

**Table S2. Primary antibodies for Immunohistochemistry and Western-blot and IHC**

| primary antibody | Details                                                   |
|------------------|-----------------------------------------------------------|
| CCL2             | mouse polyclonal, BF0556, (Affinity, Cincinnati, OH, USA) |
| GAPDH            | Rabbit monoclonal, ab181602, (abcam, Cambridge, MA, USA)  |
